# Supplementary material
Source: PubMed Central journal article supplement (PMC8285250)
Supplement: mmc1.pdf [file mmc1.pdf]

**Cell Reports, Volume 36**

**Supplemental information**

**Compartmentalization-aided interaction  
screening reveals extensive high-order  
complexes within the SARS-CoV-2 proteome**

**Weifan Xu, Gaofeng Pei, Hongrui Liu, Xiaohui Ju, Jing Wang, Qiang Ding, and Pulong Li**

# Supplemental Figure 1

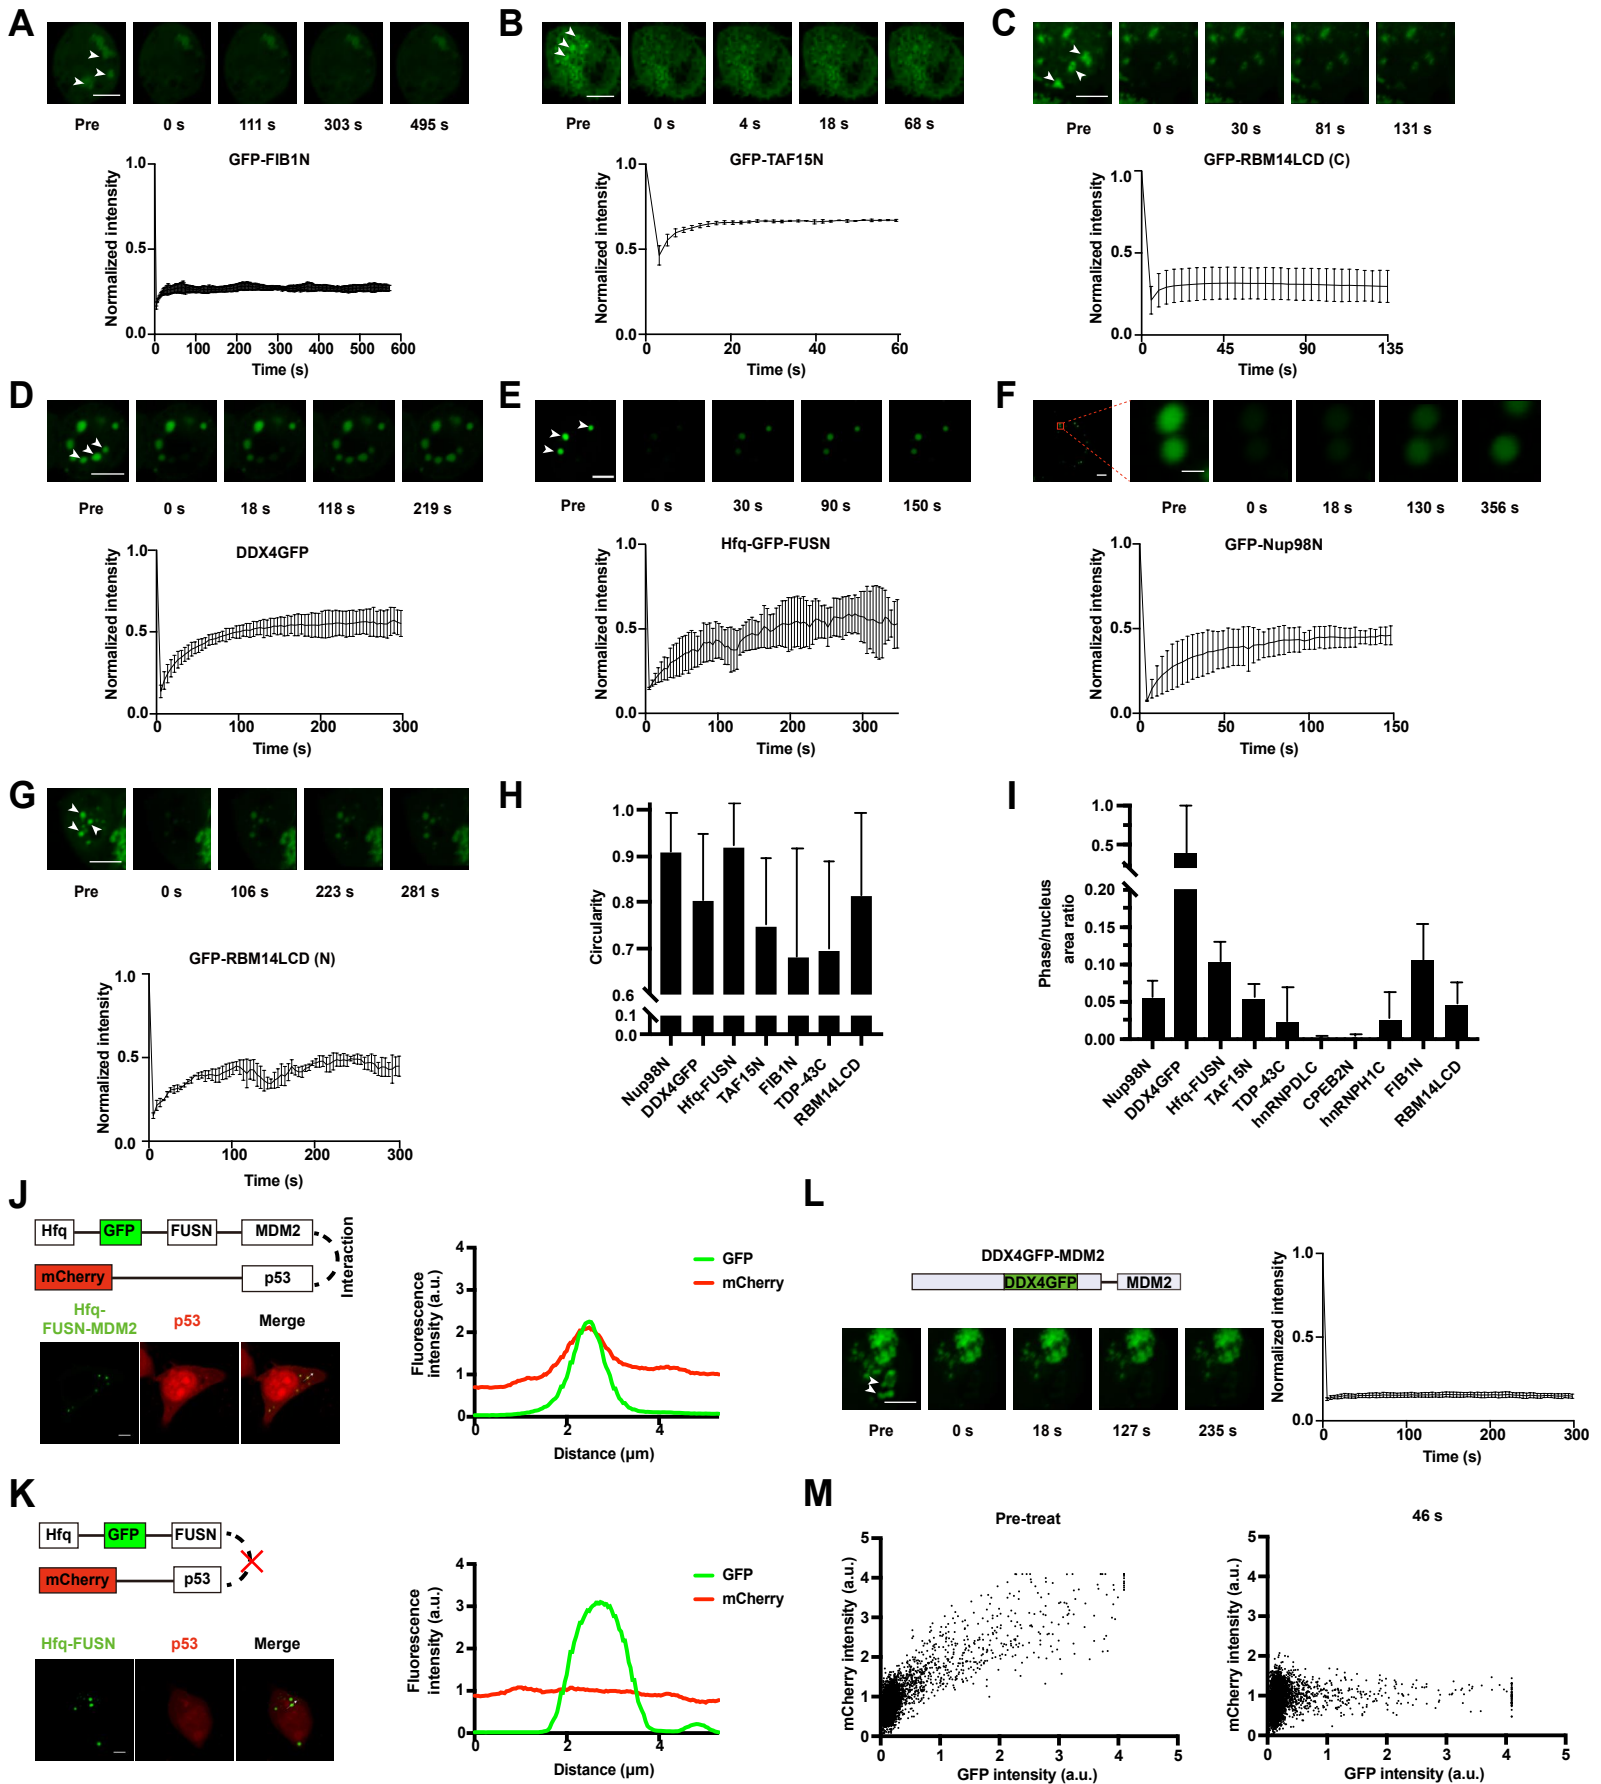

FigureS1. Characterization of scaffold candidates compartmentalizing and validating the direct interaction between p53 and MDM2 (Related to Figure1)

(A-G) FRAP analysis of scaffold candidates fused with GFP-tag in HEK293 cells. Scale bar, 5  $\mu$ m. All assays were performed in triplicates.

**(H)** Histogram of the circularity of compartments formed by testing seven protein scaffolds in cells. n (Nup98N) = 100; n (DDX4GFP) = 182; n (FUSN) = 73; n (TAF15N) = 179; n (FIB1N) = 58; n (TDP-43C) = 60; n (RBM14LCD (N)) = 120. Each data point was determined by three independent assays, and error bars represent standard deviations. Values are means  $\pm$  standard deviation.

**(I)** Histogram of the area ratio of phase-separated puncta to the nucleus, indicating the phase separation capability of the testing scaffolds. n = 6. Each data point was determined by three independent assays, and error bars represent standard deviations. Values are means  $\pm$  standard deviation.

**(J)** FRAP analysis of DDX4GFP-MDM2 in HEK293 cells. Scale bars, 5  $\mu$ m. All assays were performed in triplicates.

**(K and L)** Validation of the direct interaction between Hfq-GFP-FUSN-MDM2 and mCherry-p53 using CoPIC. The p53 fusion protein, as indicated by the mCherry signal, was recruited to the green compartment of Hfq-GFP-FUSN-MDM2 by the specific interaction (K). The co-expression of Hfq-GFP-FUSN and mCherry-p53 served as the control (L). Scale bars, 5  $\mu$ m. All assays were performed in triplicates.

**(M)** Plots of Pearson' s correlation coefficient for the intensity of and mCherry-p53 versus GFP-Nup98N-MDM2 pre-treatment and after 46 s. Each data point was determined by three independent assays.

# Supplemental Figure 2

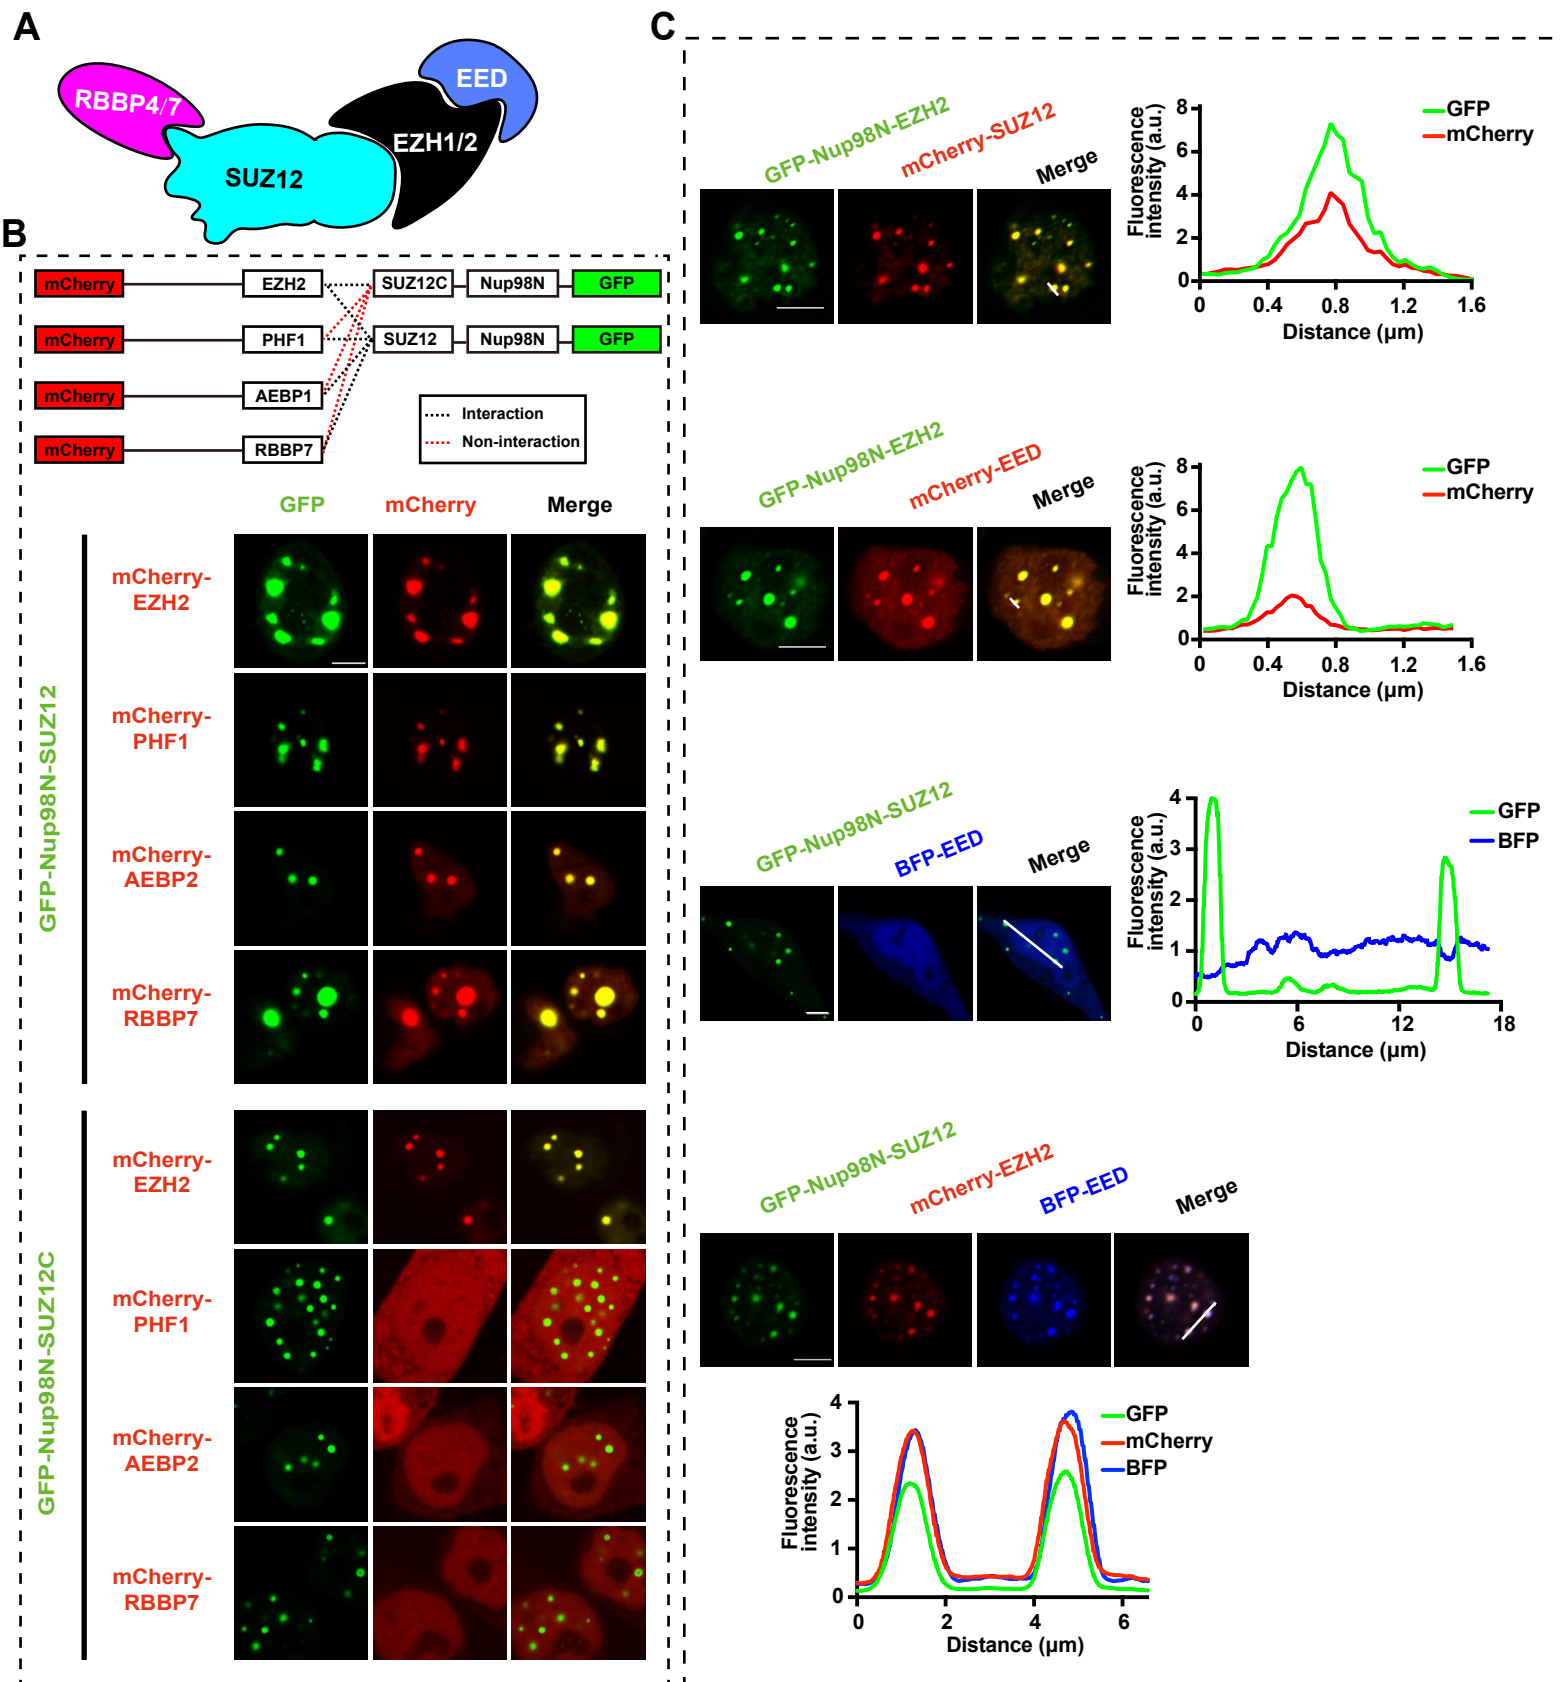

Figure S2. CoPIC analysis of the interaction patterns of SUZ12 with the binding factors and EZH2-mediated indirect interaction of SUZ12 with EED (Related to Figure 2)

(A) Schematic diagram depicting the architecture of the PRC2 complex.

**(B)** CoPIC analysis of pair-wise interactions between GFP-Nup98N fused SUZ12 (full-length SUZ12) or SUZ12C (C-terminal region of SUZ12) and mCherry-fused binding factors (EZH2, RBBP7, PHF1 and AEBP2). Scale bar, 5  $\mu$ m. All assays were performed in triplicates.

**(C)** CoPIC analysis of the indirect interaction of SUZ12 with EED mediated by EZH2. Scale bars, 5  $\mu$ m. All assays were performed in triplicates.

# Supplemental Figure 3

**A**

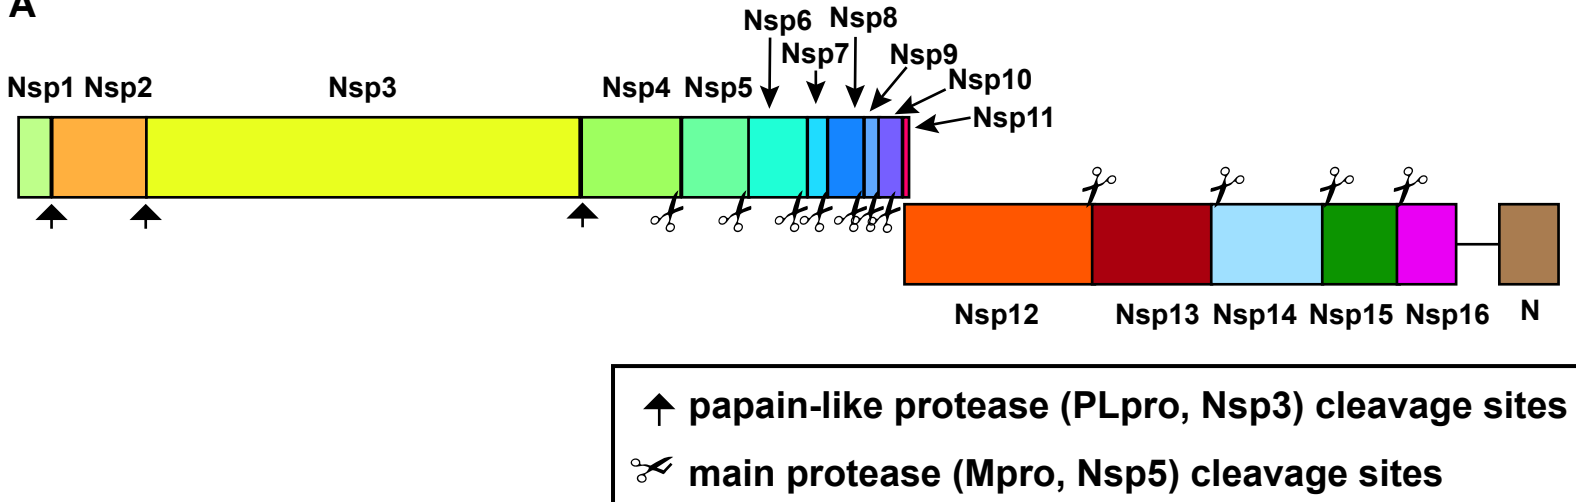

**B**

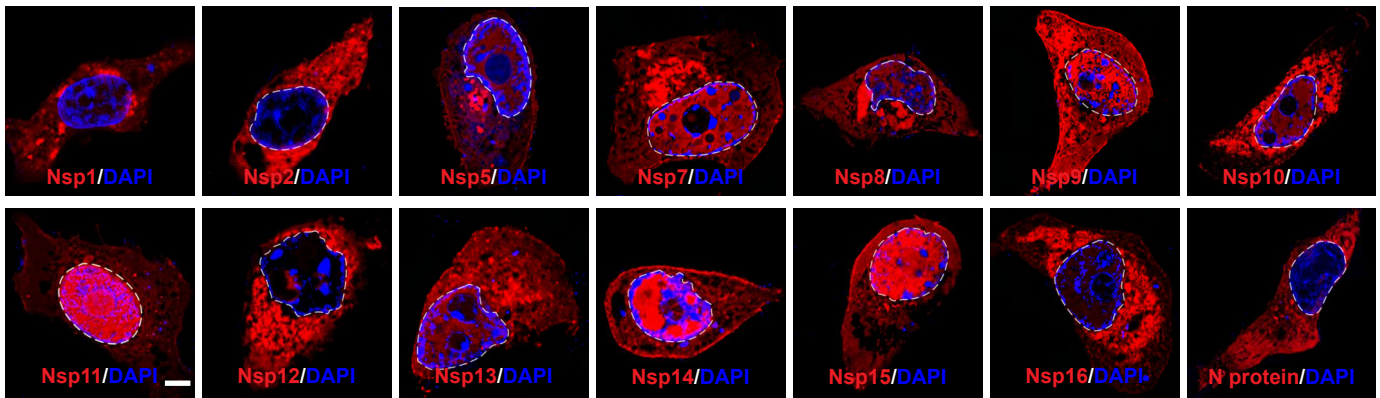

**C**

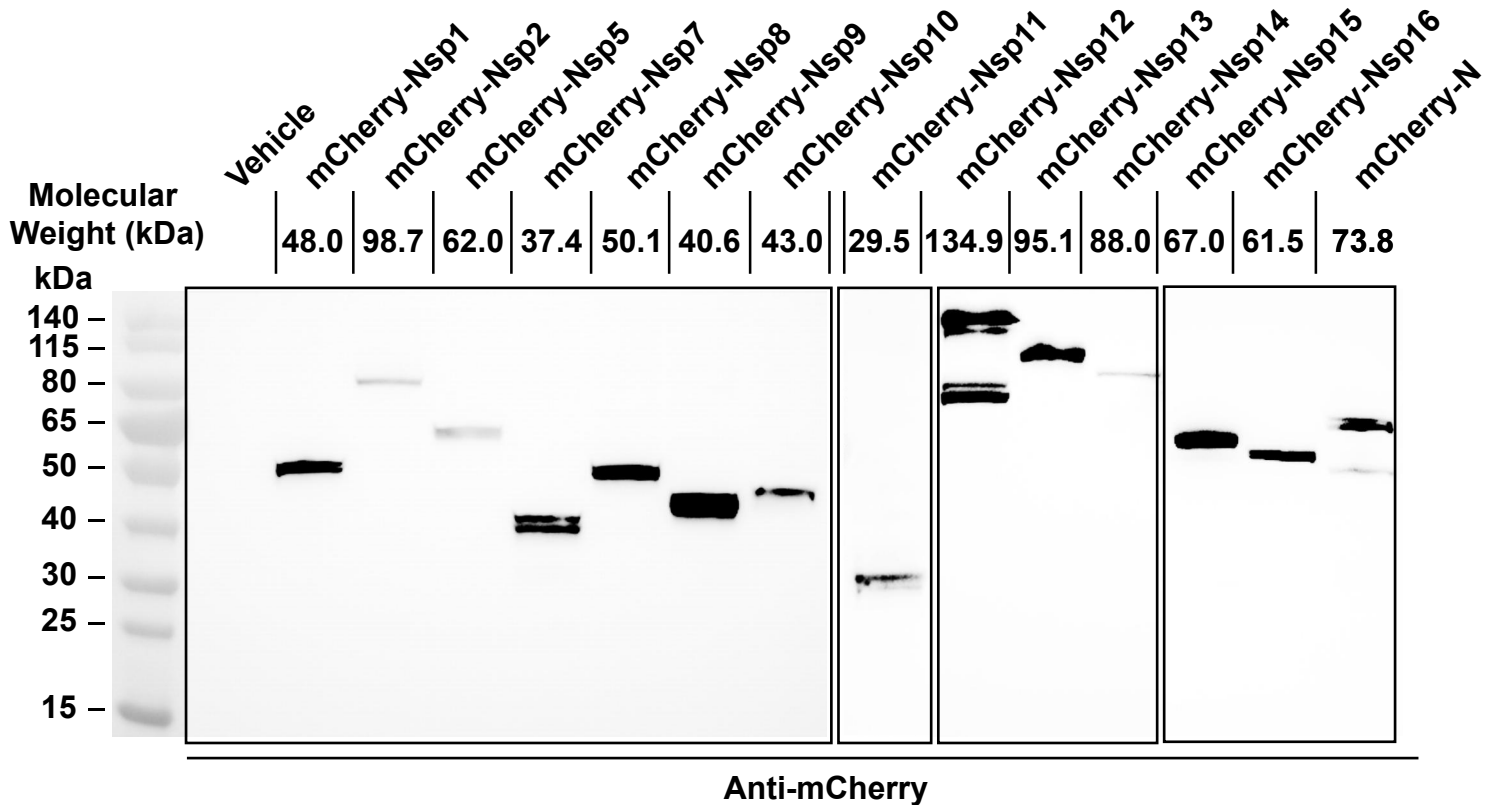

Figure S3. Genome annotation and subcellular localization of SARS-CoV-2 RTC-related factors (Related to Table 1 and Figure 3)

(A) SARS-CoV-2 genome annotation on replication/transcription-related factors.

**(B)** Subcellular localization of SARS-CoV-2 Nsp5 and N protein used in CoPIC screening. Scale bar, 5  $\mu$ m.

**(C)** Western blot validation of the constructs fused with an mCherry tag expressed in Vero E6 cells. The cell lysates were extracted and examined with the specific antibody against mCherry.

# Supplemental Figure 4

**A**

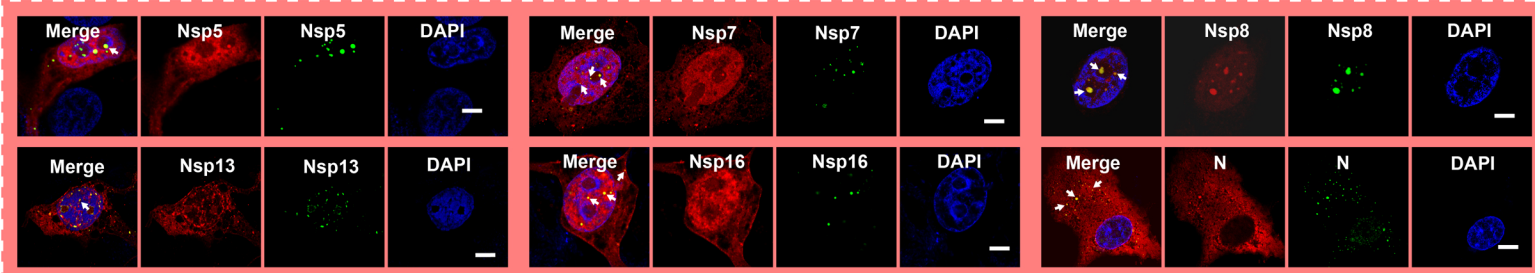

**B**

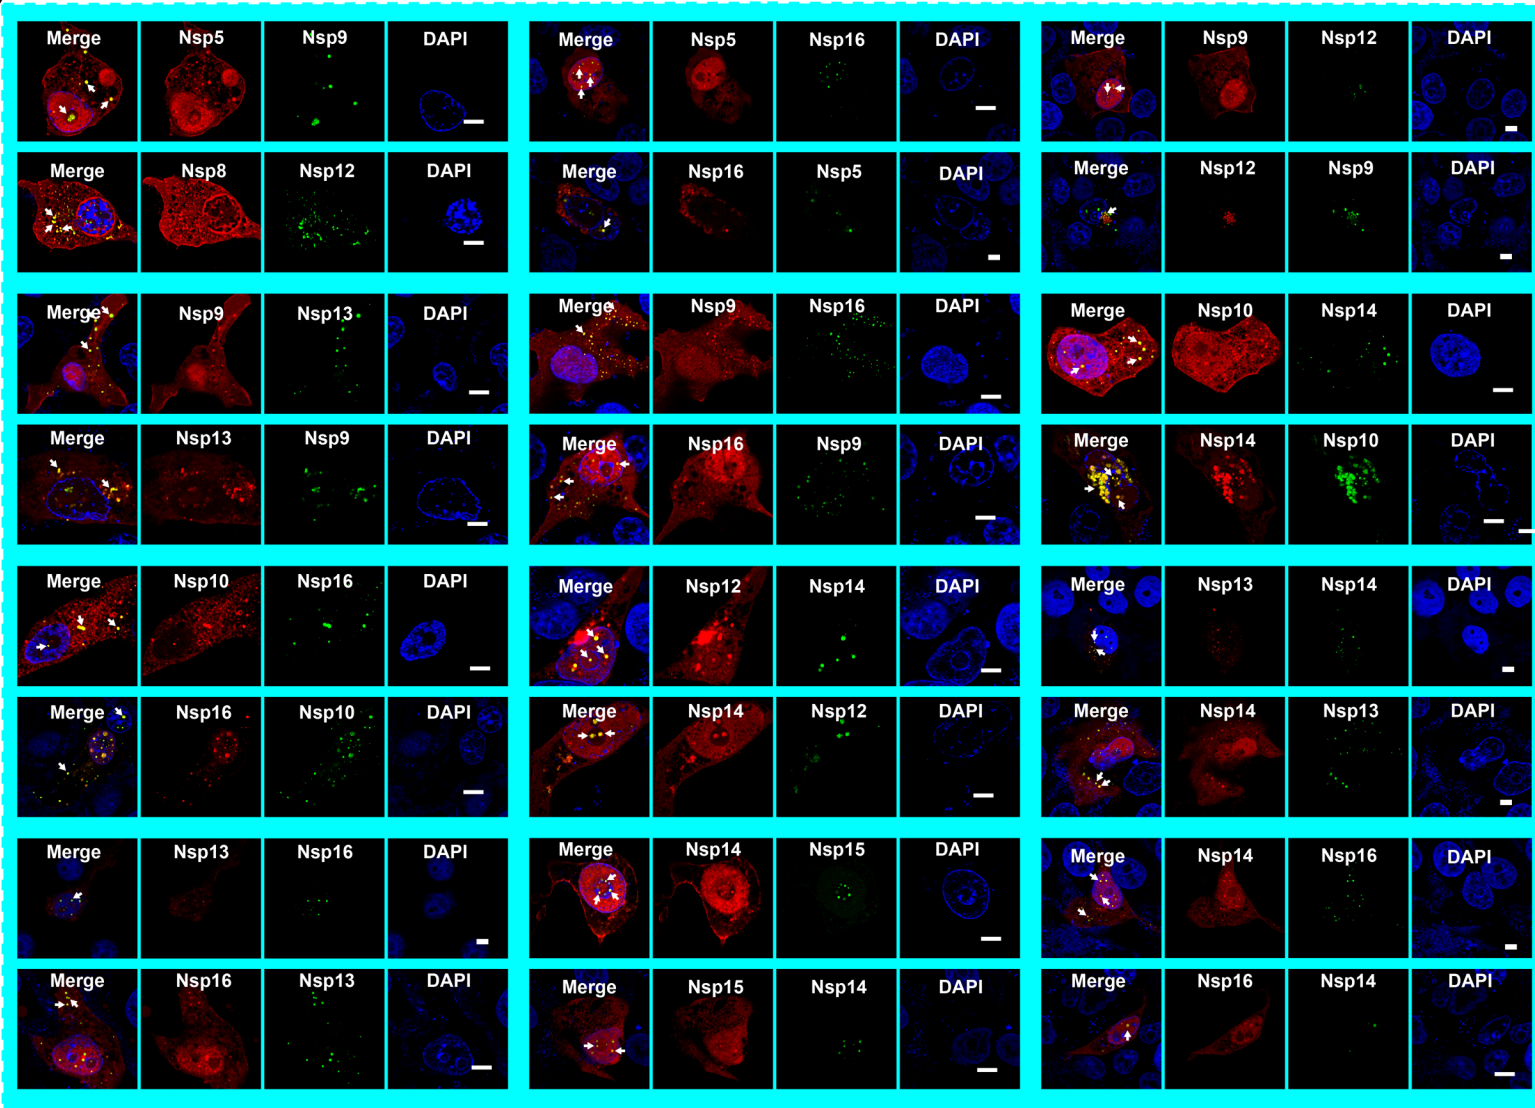

**Figure S4. Positive pairwise (self- and bidirectional-) interactions of SARS-CoV-2 identified by CoPIC screening (Related to Figures 3, 4 and 5)**

**(A)** Collections of positive self-interactions identified by CoPIC screening. All assays were performed in triplicates. Scale bar, 5  $\mu$ m.

**(B)** Collections of positive bidirectional interactions identified by CoPIC screening. All assays were performed in triplicates. Scale bar, 5  $\mu$ m.



# Supplemental Figure 5

A

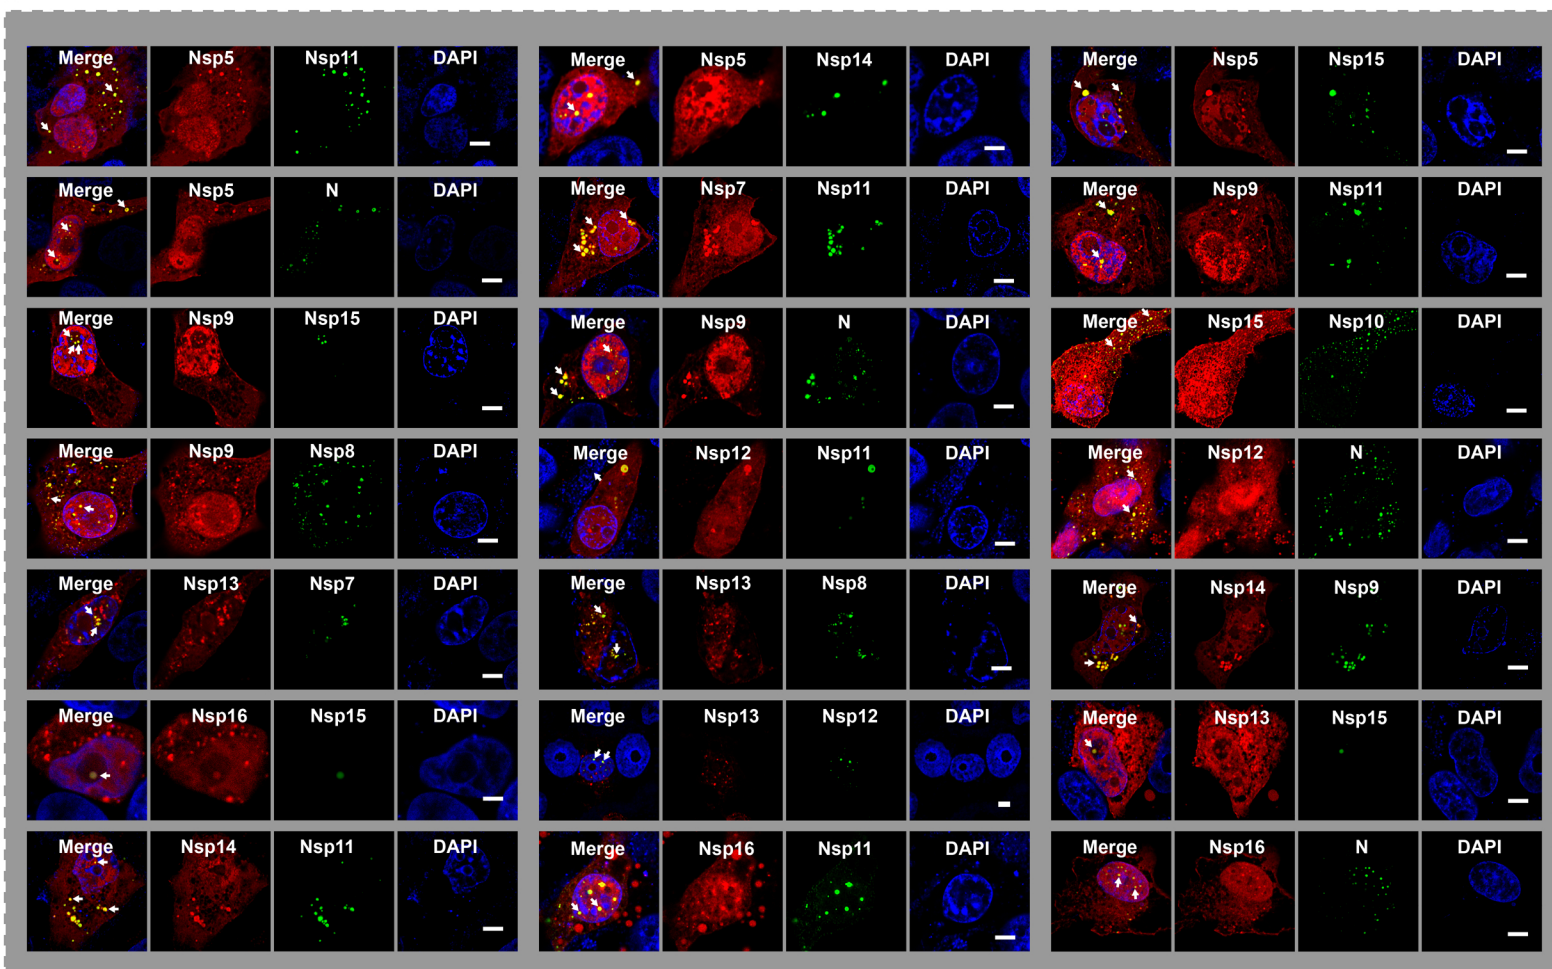

B

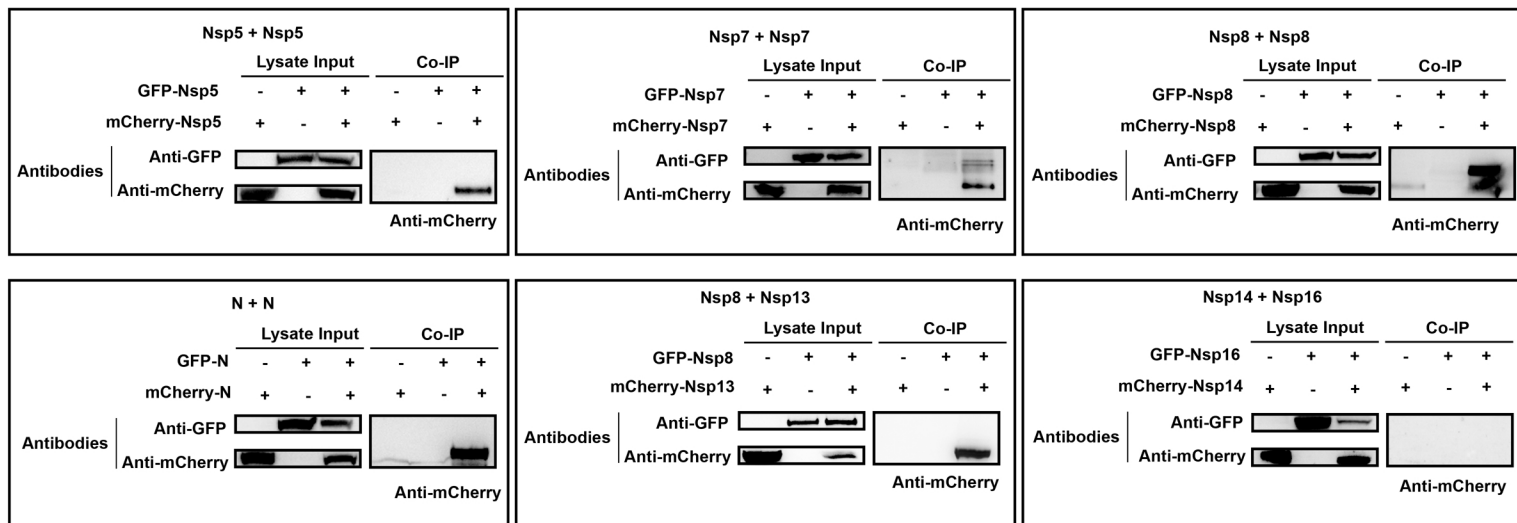

Figure S5. Positive pairwise (unidirectional-) interactions of SARS-CoV-2 identified by CoPIC screening (Related to Figures 3, 4 and 5)

(A) Collections of positive unidirectional interactions identified by CoPIC screening. All assays were performed in triplicates. Scale bar, 5  $\mu$ m.

(B) Co-IP analysis of selected pairwise interactions identified by CoPIC screening.

# Supplemental Figure 6

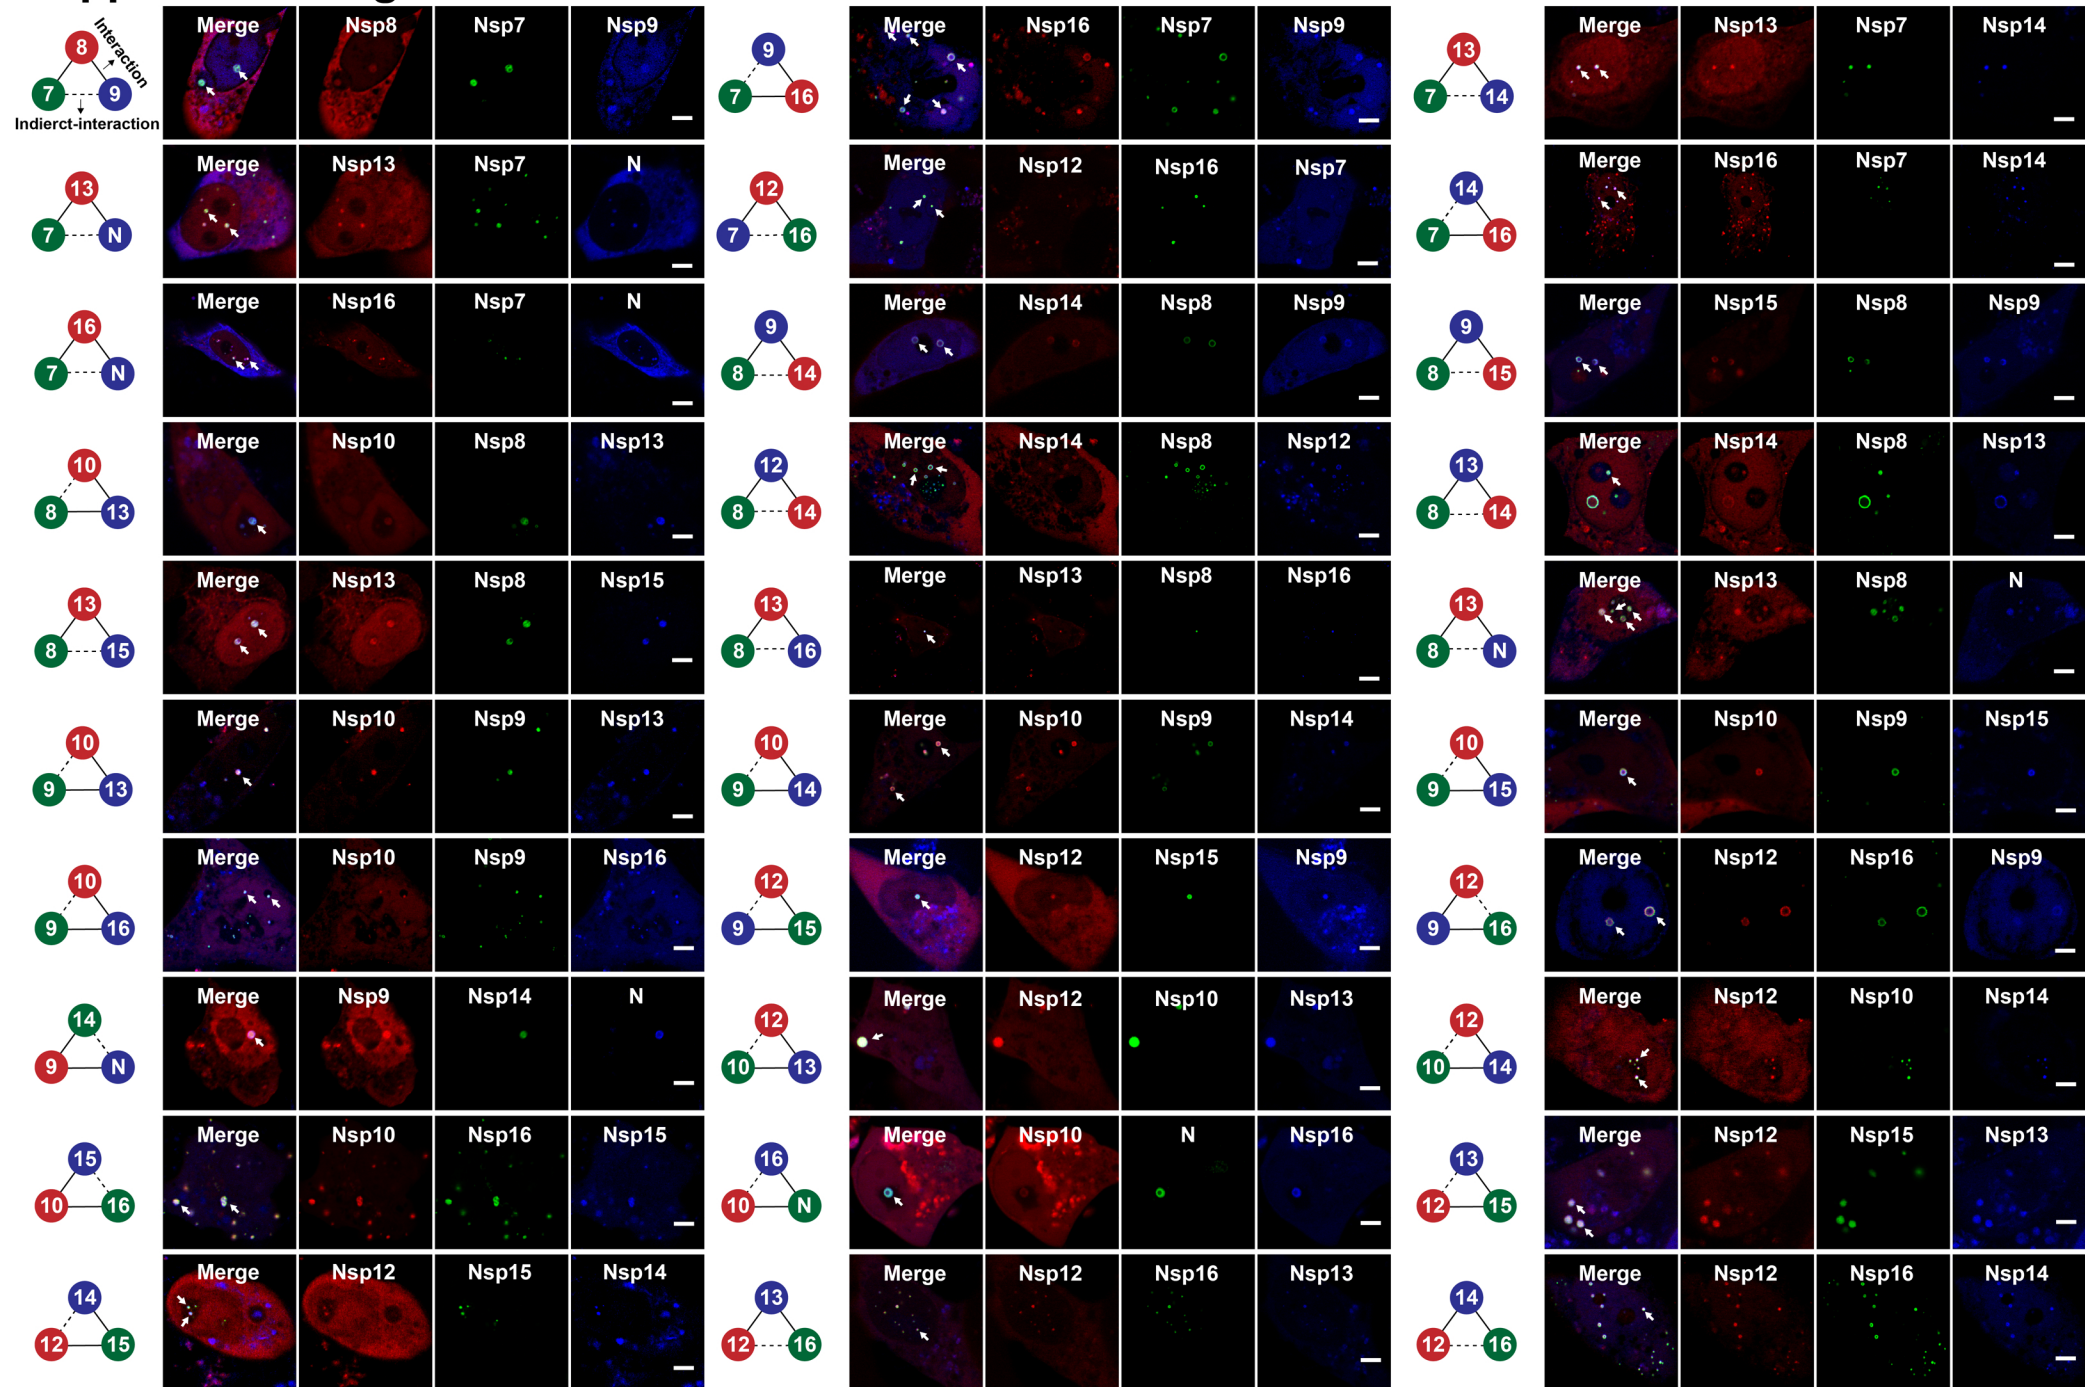

Figure S6. Collections of positive tertiary complexes identified by CoPIC screening (Related to Figure 6)

Positive tertiary interactions identified by CoPIC screening. All assays were performed in triplicates. Scale bar, 5  $\mu$ m.

# Supplemental Figure 7

A

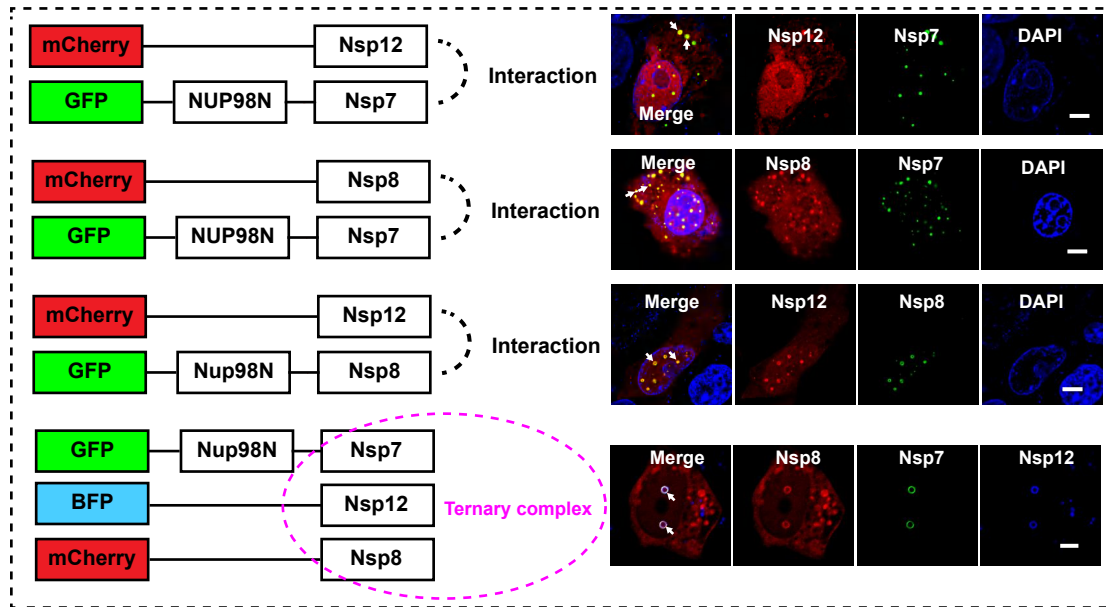

B

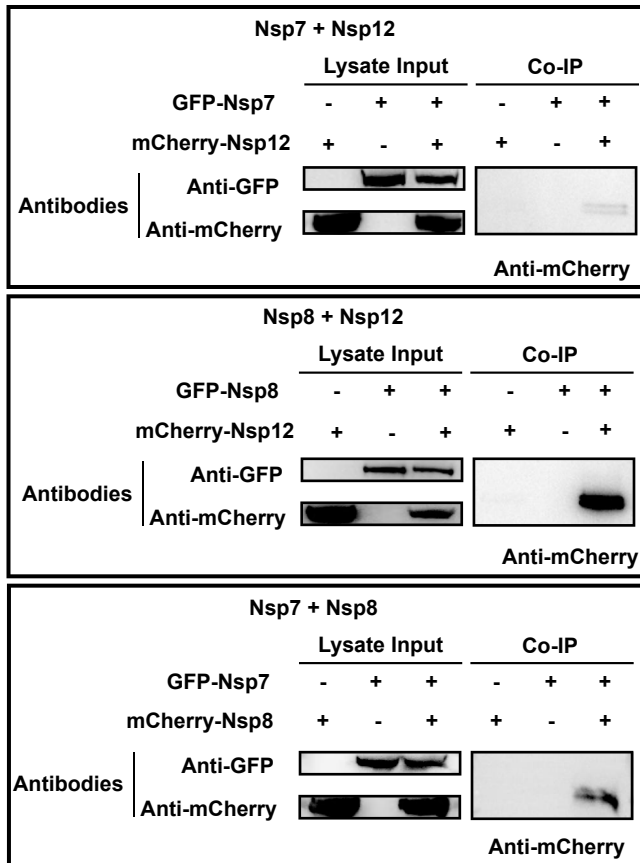

C

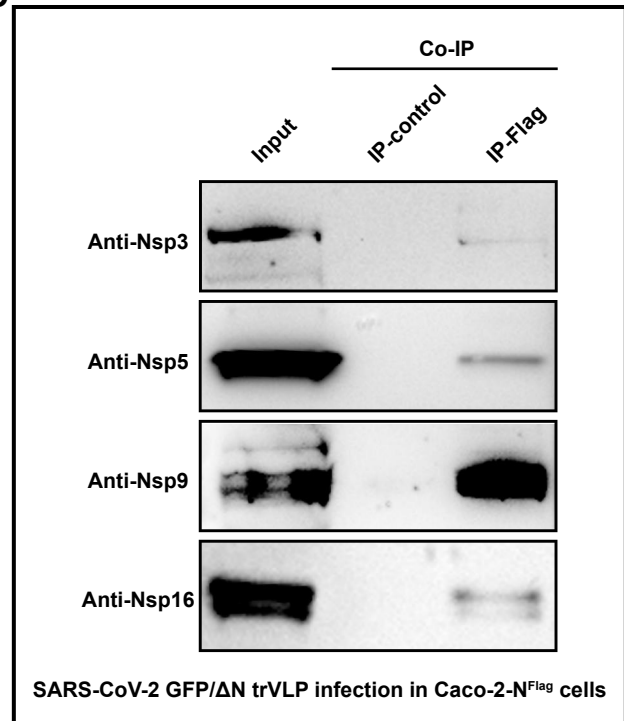

Figure S7. Characterization of mutual interactions among Nsp7, Nsp8, and Nsp12 (Related to Figure 6)

- (A) CoPIC analysis of binary and tertiary interactions among Nsp7, Nsp8, and Nsp12. All assays were performed in triplicates. Scale bar, 5  $\mu$ m.
- (B) CoIP validation of pairwise interactions between Nsp7 and Nsp8, Nsp7 and Nsp12, Nsp8 and Nsp12. All assays were performed in triplicates.
- (C) CoIP analysis of Nprotein and binding candidates under SARS-CoV-2 GFP/ $\Delta$ N trVLP infection in Caco-2-N<sup>Flag</sup> cells.

# Supplemental Figure 8

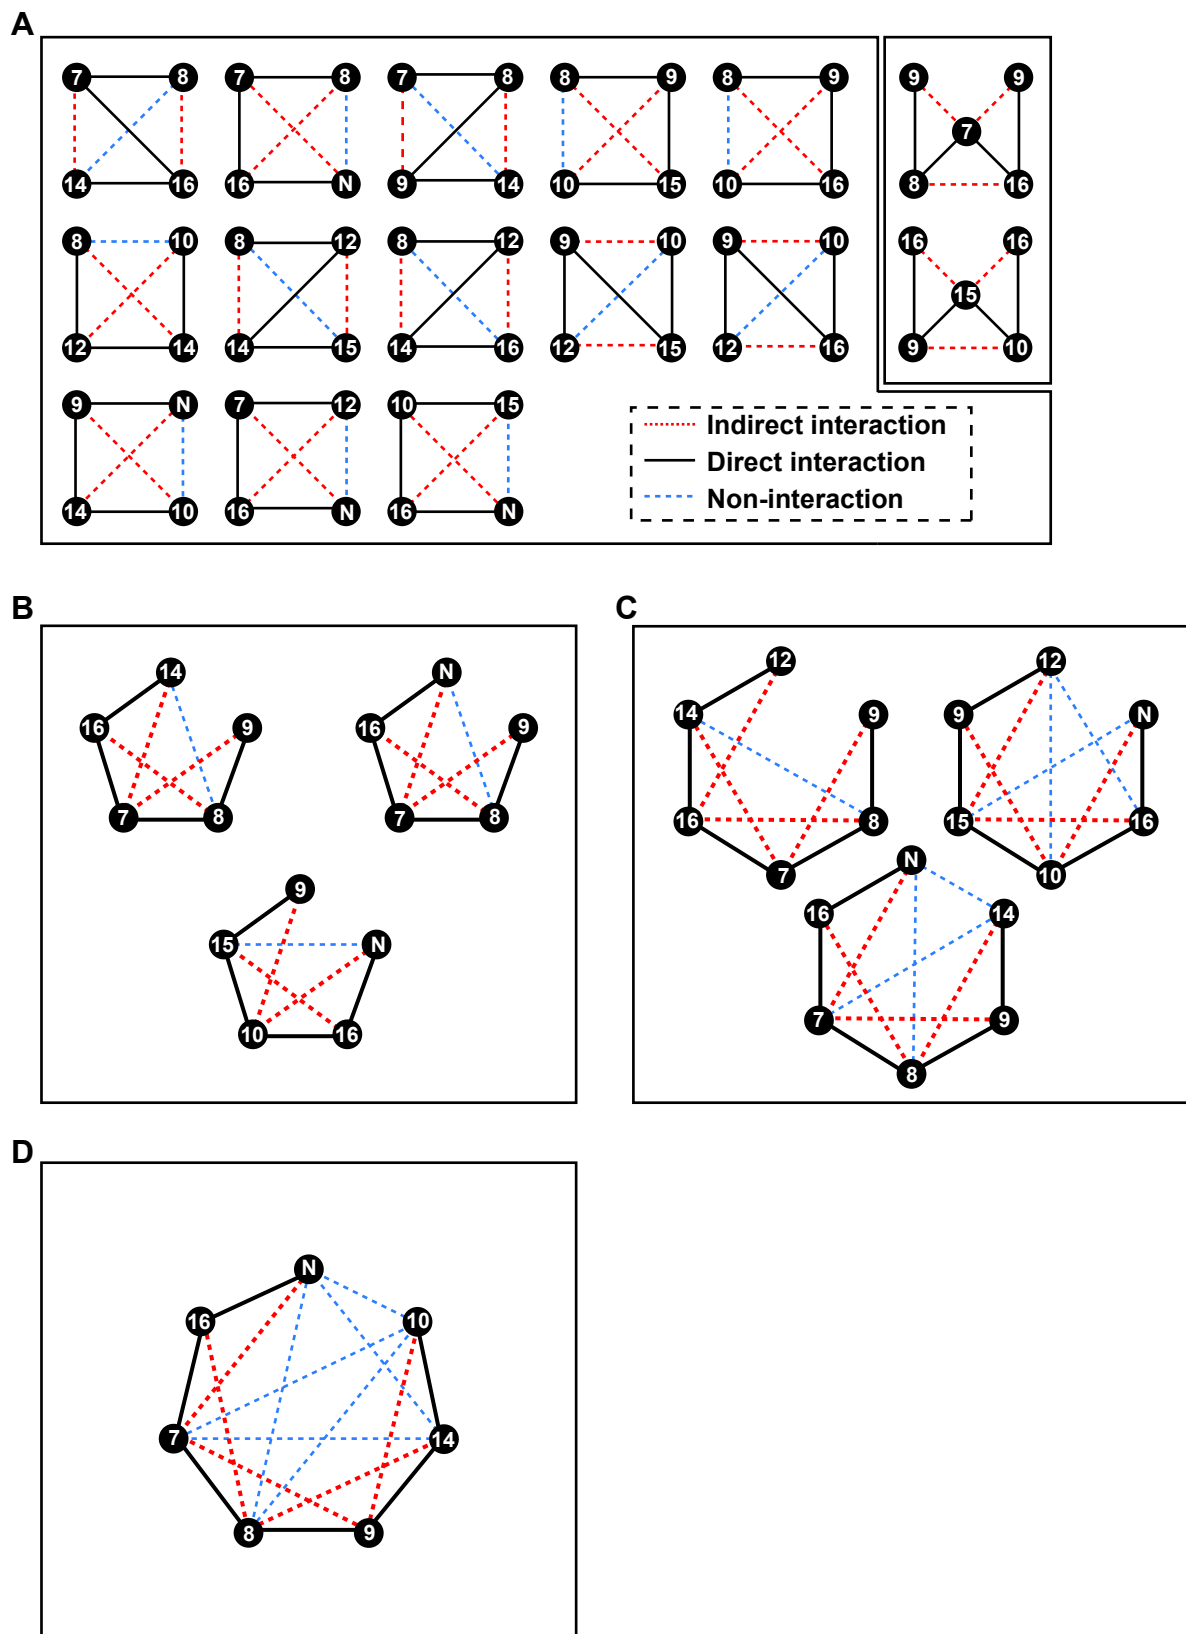

**Figure S8. Higher-order complexes deduced from CoPIC analysis (Related to Figure 7)**

(A) List of quaternary complexes deduced from CoPIC analysis.

(B) List of quinary complexes deduced from CoPIC analysis.

(C) List of six-membered complexes deduced from CoPIC analysis.

(D) List of seven-membered complexes deduced from CoPIC analysis.

**Table S1 Sequence information for RTC-related viral proteins of SARS-CoV-2 used in the study for plasmid construction.  
(Related to Figure 3)**

| Protein   | Accession Number | Nucleotide positions | Position in polyprotein | Protein length (aa) |
|-----------|------------------|----------------------|-------------------------|---------------------|
| Nsp1      | YP_009725297.1   | 266-805              | M1-G180                 | 180                 |
| Nsp2      | YP_009725298.1   | 806-2719             | A181-G818               | 638                 |
| Nsp5      | YP_009725301.1   | 10055-10972          | S3264-Q3569             | 306                 |
| Nsp7      | YP_009725303.1   | 11843-12091          | S3860-Q3942             | 83                  |
| Nsp8      | YP_009725304.1   | 12092-12685          | A3943-Q4140             | 198                 |
| Nsp9      | YP_009725305.1   | 12686-13024          | N4141-Q4253             | 113                 |
| Nsp10     | YP_009725306.1   | 13025-13441          | A4254-Q4392             | 139                 |
| Nsp11     | YP_009725312.1   | 13442-13480          | S4393-V4405             | 13                  |
| Nsp12     | YP_009725307.1   | 12480-16236          | V4406-Q5324             | 919                 |
| Nsp13     | YP_009725308.1   | 16237-18039          | A5325-Q5925             | 601                 |
| Nsp14     | YP_009725309.1   | 18040-19620          | A5926-6452              | 527                 |
| Nsp15     | YP_009725310.1   | 19621-20658          | S6453-Q6798             | 346                 |
| Nsp16     | YP_009725311.1   | 20659-21555          | S6799-N7096             | 298                 |
| N protein | YP_009724397.2   | 28274-29533          | --                      | 419                 |

**Table S2 Collections of reported interaction patterns of SARS-CoV. (Related to Figure 4)**

| <b>Number</b> | <b>Positive interactions</b> | <b>References</b>        |
|---------------|------------------------------|--------------------------|
| 1             | Nsp2-Nsp2                    | (von Brunn et al., 2007) |
| 2             | Nsp2-Nsp7                    | (Pan et al., 2008)       |
| 3             | Nsp2-Nsp8                    | (von Brunn et al., 2007) |
| 4             | Nsp2-Nsp11                   | (von Brunn et al., 2007) |
| 5             | Nsp2-Nsp15                   | (Pan et al., 2008)       |
| 6             | Nsp2-Nsp16                   | (von Brunn et al., 2007) |
| 7             | Nsp5-Nsp5                    | (von Brunn et al., 2007) |
| 8             | Nsp5-Nsp7                    | (von Brunn et al., 2007) |
| 9             | Nsp5-Nsp8                    | (von Brunn et al., 2007) |
| 10            | Nsp5-Nsp12                   | (Pan et al., 2008)       |
| 11            | Nsp5-Nsp14                   | (Pan et al., 2008)       |
| 12            | Nsp7-Nsp7                    | (von Brunn et al., 2007) |
| 13            | Nsp7-Nsp8                    | (von Brunn et al., 2007) |
| 14            | Nsp7-Nsp9                    | (von Brunn et al., 2007) |
| 15            | Nsp7-Nsp13                   | (von Brunn et al., 2007) |
| 16            | Nsp8-Nsp8                    | (von Brunn et al., 2007) |
| 17            | Nsp8-Nsp9                    | (von Brunn et al., 2007) |
| 18            | Nsp8-Nsp12                   | (von Brunn et al., 2007) |
| 19            | Nsp8-Nsp13                   | (von Brunn et al., 2007) |
| 20            | Nsp8-Nsp14                   | (von Brunn et al., 2007) |
| 21            | Nsp9-Nsp9                    | (Sutton et al., 2004)    |
| 22            | Nsp10-Nsp10                  | (Su et al., 2006)        |
| 23            | Nsp10-Nsp14                  | (Pan et al., 2008)       |
| 24            | Nsp10-Nsp16                  | (Pan et al., 2008)       |
| 25            | Nsp12-Nsp13                  | (von Brunn et al., 2007) |
| 26            | Nsp13-Nsp13                  | (von Brunn et al., 2007) |
| 27            | Nsp15-Nsp15                  | (Joseph et al., 2007)    |
| 28            | N protein-N protein          | (Chen et al., 2007)      |
